# Supplementary material for: Synergistic boron-dopants and boron-induced oxygen vacancies in MnO2 nanosheets to promote electrocatalytic nitrogen reduction
Source: Royal Society of Chemistry journal article supplement (doi:10.1039/d0ta00220h), 2020-01-01
Supplement: d0ta00220h1.pdf [file d0ta00220h1.pdf]

## Supporting Information

### **Synergistic boron-dopants and boron-induce oxygen vacancies in MnO<sub>2</sub> nanosheets to promote electrocatalytic nitrogen reduction**

Ke Chu\*, Ya-ping Liu, Yong-hua Cheng, Qing-qing Li

*School of Materials Science and Engineering, Lanzhou Jiaotong University, Lanzhou 730070,  
China*

\*Corresponding author. E-mail address: chukelut@163.com (K. Chu)

## Experimental

### *Synthesis of B-MnO<sub>2</sub>*

All the chemicals were used as received without further purification. Typically, a piece of as-obtained CC (1 cm × 4 cm) was ultrasonically treated in concentrated HCl for 1 h, and cleaned with ethanol and distilled water several times. Then, 2 mM of KMnO<sub>4</sub> and 0.03 mM of NH<sub>4</sub>HB<sub>4</sub>O<sub>7</sub>·3H<sub>2</sub>O were diluted into 40 mL of distilled water. The mixed solution was transferred into a Teflon-lined stainless-steel autoclave, following by immersing the pretreated CC in the solution. The autoclave was sealed and kept at 180 °C for 16 h in an oven. After cooling to room temperature, the obtained B-MnO<sub>2</sub>/CC was washed with deionized water and ethanol several times, and dried at 60 °C overnight. For comparison, the pristine MnO<sub>2</sub>/CC was prepared by the same procedure without addition of NH<sub>4</sub>HB<sub>4</sub>O<sub>7</sub>·3H<sub>2</sub>O.

### *Electrochemical measurements*

Electrochemical measurements were tested on a CHI-660E electrochemical workstation. The prepared CC sample was directly used as a working electrode. The graphite rod and Ag/AgCl were used as reference and counter electrodes, respectively. All potentials were referenced to the reversible hydrogen electrode (RHE). The RHE calibration was experimentally conducted in the high-purity hydrogen saturated 0.5 M LiClO<sub>4</sub> electrolyte by cyclic voltammeters curves, with using graphite rod and Pt wire as counter and working electrodes, respectively (Fig. S2). The NRR tests were conducted in an H-type two-compartment electrochemical cell separated by a Nafion 211 membrane. An absorber was set at the end of cell to avoid the loss of produced NH<sub>3</sub> by N<sub>2</sub> flow. The Nafion membrane was pretreated by boiling it in 5% H<sub>2</sub>O<sub>2</sub> solution for 1 h, 0.5 M H<sub>2</sub>SO<sub>4</sub> for 1 h and deionized water for 1 h in turn. Prior to each electrolysis, the cathodic compartment was purged with Ar for 30 min. During each electrolysis, ultra-high-purity N<sub>2</sub> gas (99.999%) was continuously purged into the cathodic chamber at a flow rate of 20 mL min<sup>-1</sup>. After each NRR electrolysis, the solution in absorber was poured back into the cathodic compartment for the NH<sub>3</sub> detection. The produced NH<sub>3</sub> and possible N<sub>2</sub>H<sub>4</sub> were quantitatively determined by

the indophenol blue method[1], and approach of Watt and Chrisp[2], respectively.

### ***Determination of $N_2H_4$***

Typically, 5 mL of electrolyte was removed from the electrochemical reaction vessel. The 330 mL of color reagent containing 300 mL of ethyl alcohol, 5.99 g of  $C_9H_{11}NO$  and 30 mL of HCl were prepared, and 5 mL of color reagent was added into the electrolyte. After stirring for 10 min, the UV-vis absorption spectrum was measured and the concentration-absorbance curves were calibrated by the standard  $N_2H_4$  solution with a series of concentrations.

### ***Determination of $NH_3$***

Typically, 4 mL of electrolyte was removed from the electrochemical reaction vessel. Then 50  $\mu$ L of solution containing NaOH (0.75 M) and NaClO ( $\rho_{Cl} = \sim 4.5$ ), 500  $\mu$ L of solution containing 0.32 M NaOH, 0.4 M  $C_7H_6O_3Na$ , and 50  $\mu$ L of  $C_5FeN_6Na_2O$  solution (1 wt%) were respectively added into the electrolyte. After standing for 2 h, the UV-Vis absorption spectrum was measured and the concentration-absorbance curves were calibrated by the standard  $NH_4Cl$  solution with a series of concentrations.

$NH_3$  yield was calculated by the following equation:

$$NH_3 \text{ yield } (\mu g \text{ h}^{-1} \text{ mg}_{cat}^{-1}) = \frac{c_{NH_3} \times V}{t \times m} \quad (1)$$

Faradaic efficiency was calculated by the following equation:

$$\text{Faradaic efficiency (\%)} = \frac{3 \times F \times c_{NH_3} \times V}{17 \times Q} \times 100\% \quad (2)$$

where  $c_{NH_3}$  ( $\mu g \text{ mL}^{-1}$ ) is the measured  $NH_3$  concentration,  $V$  (mL) is the volume of the electrolyte,  $t$  (h) is the reduction time and  $m$  (mg) is the mass loading of the catalyst on CC.  $F$  ( $96500 \text{ C mol}^{-1}$ ) is the Faraday constant,  $Q$  (C) is the quantity of applied electricity.

### ***Characterizations***

Scanning electron microscopy (SEM) was performed on a JSM-6701 microscope. Transmission electron microscopy (TEM), high-resolution transmission electron microscopy (HRTEM), and high-angle annular dark field (HAADF)-scanning

transmission electron microscopy (STEM) were conducted on a Tecnai G<sup>2</sup> F20 microscope. X-ray diffraction (XRD) pattern was performed on a Rigaku D/max 2400 diffractometer. Nitrogen adsorption/desorption isotherms were recorded on an ASAP 2020 instrument. X-ray photoelectron spectroscopy (XPS) analysis was recorded on a PHI 5702 spectrometer. Ion chromatogram measurements were conducted on a Dionex ICS-2000 ion chromatographs. <sup>1</sup>H nuclear magnetic resonance (NMR) measurements were performed on a 500 MHz Bruker superconducting-magnet NMR spectrometer. Prior to NMR measurements, <sup>14</sup>N<sub>2</sub> or <sup>15</sup>N<sub>2</sub> feed gas was purified by an acid trap (0.05 M H<sub>2</sub>SO<sub>4</sub>) to eliminate the potential NO<sub>x</sub> and NH<sub>3</sub> contaminants.

### ***Calculation details***

All calculations were carried out using spin-polarized density functional theory (DFT) conducted on a Cambridge sequential total energy package (CASTEP)[3]. The generalized gradient approximation (GGA) of Perdew–Becke–Ernzerhof (PBE) is used for the exchange–correlation interactions. DFT-D scheme was adopted to account for the van der Waals interactions throughout the calculations. During structure optimization, the energy change criterion was set to 2×10<sup>-5</sup> eV and 0.01 eV/Å for the energy and forces, respectively. A plane-wave basis set with an energy cutoff of 500 eV was used and the Brillouin zone was sampled in a 3×3×1 mesh. The MnO<sub>2</sub> (001) was modeled by a three-layered 3×3×1 supercell, and a vacuum region of 20 Å was used to separate adjacent slabs. During the calculations, all the atoms of the slab model were fully relaxed.

The computational hydrogen electrode (CHE) model was used to calculate the Gibbs free energy change ( $\Delta G$ ) of reaction steps:

$$\Delta G = \Delta E + \Delta ZPE - T\Delta S + \Delta G_U + \Delta G_{pH} \quad (3)$$

where  $\Delta E$  is the electronic energy difference,  $\Delta ZPE$  is the zero point energy difference,  $T$  is the room temperature (298 K) and  $\Delta S$  is the entropy change.  $\Delta G_U$  is the contribution of electrode potential, which can be calculated by:  $\Delta G_U = -eU$ , where  $U$  is the applied potential.  $\Delta G_{pH}$  is the free energy correction of pH, which can be

calculated by:  $\Delta G_{\text{pH}} = -k_{\text{B}}T \times \text{pH} \times \ln 10$ , where  $k_{\text{B}}$  is the Boltzmann constant, and the value of pH was set to be 7 for neutral medium used in our work. The transition state of water dissociation was analyzed by a combined linear synchronous transit (LST) and quadratic synchronous transit (QST) tools.

The formation energy ( $E_{\text{f}}$ ) of  $\text{MnO}_2$  containing either surface B-dopant (B- $\text{MnO}_2$ ), or OV(OV- $\text{MnO}_2$ ), or both (B-OV- $\text{MnO}_2$ ) can be defined as:

$$E_{\text{f}}(\text{B-MnO}_2) = E(\text{B-MnO}_2) - E(\text{MnO}_2) - \mu_{\text{B}} + \mu_{\text{O}} \quad (4)$$

$$E_{\text{f}}(\text{MnO}_2\text{-OV}) = E(\text{MnO}_2\text{-OV}) - E(\text{MnO}_2) + \mu_{\text{O}} \quad (5)$$

$$E_{\text{f}}(\text{B-OV-MnO}_2) = E(\text{B-OV-MnO}_2) - E(\text{MnO}_2) - \mu_{\text{B}} + \mu_{\text{Mn(O)}} + \mu_{\text{O}} \quad (6)$$

where  $E$  is the total energies of corresponding structures,  $\mu$  is the chemical potential of corresponding atoms.

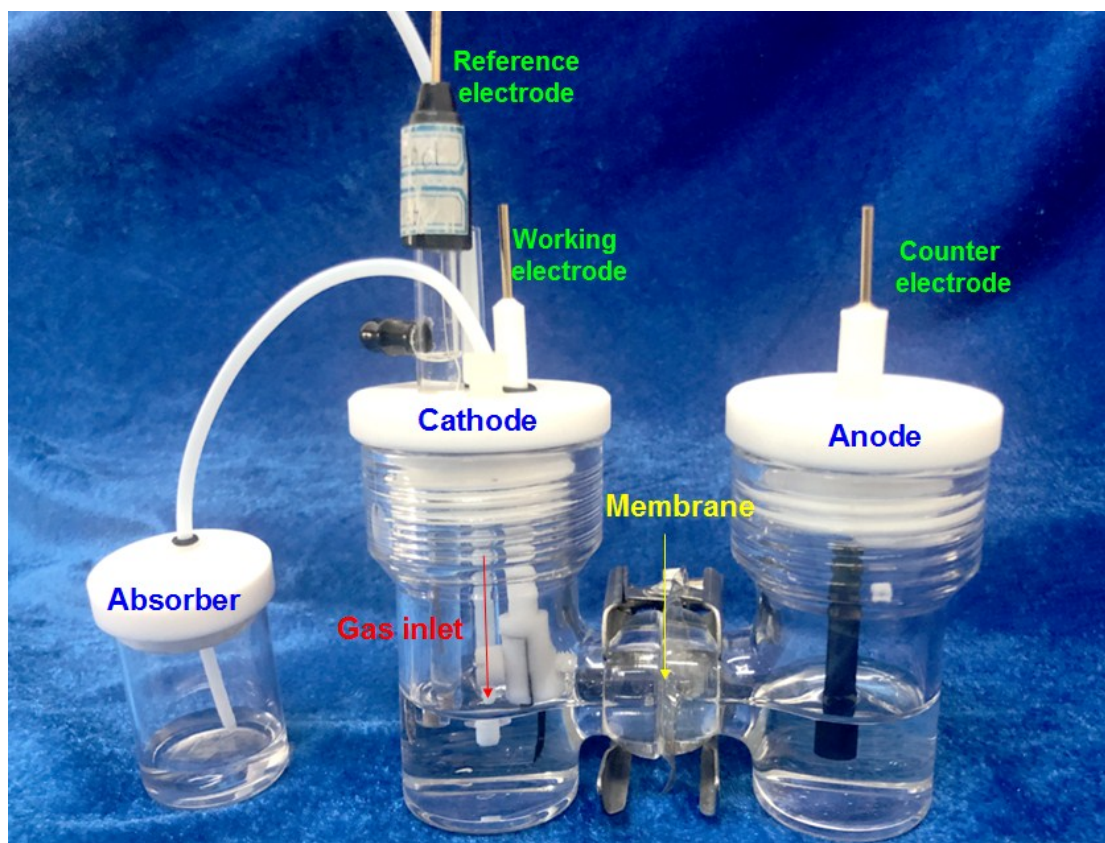

Fig. S1. Photograph of H-type electrochemical setup.

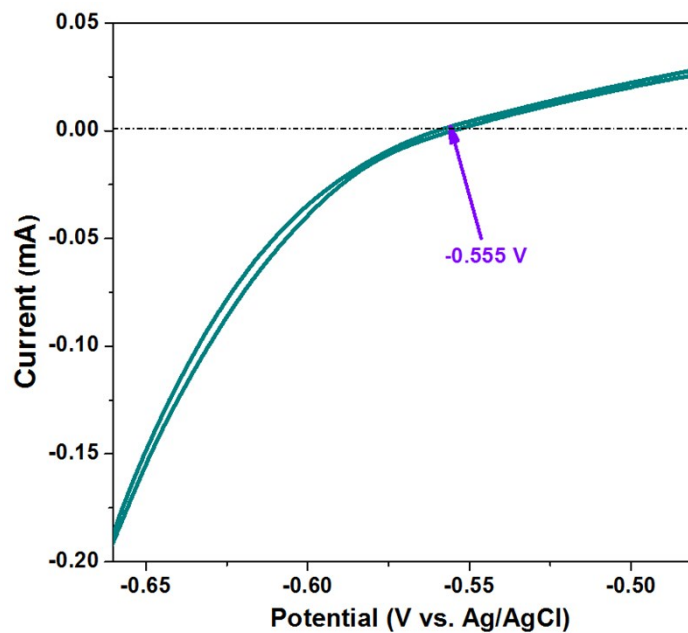

Fig. S2. The RHE calibration in 0.5 M  $\text{LiClO}_4$  electrolyte.

The RHE calibration was conducted in the high-purity hydrogen saturated 0.5 M  $\text{LiClO}_4$  electrolyte. The graphite rod and Pt wire were used as the counter and working electrodes, respectively. The cyclic voltammetry curves were performed at a scan rate of  $1 \text{ mV s}^{-1}$ . The RHE calibration potential for the hydrogen oxidation/evolution reactions is the average value of the two potentials at which the current crosses zero. It is shown in Fig. S2 that the  $E(\text{RHE})$  is larger than  $E(\text{Ag/AgCl})$  by 0.555 V. Therefore, we have

$$E(\text{RHE}) = E(\text{Ag/AgCl}) + 0.555.$$

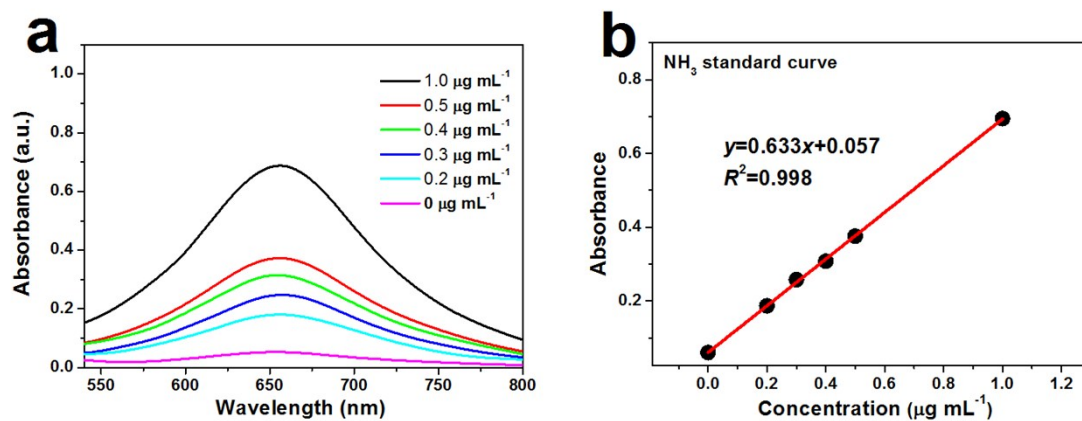

Fig. S3. (a) UV-Vis absorption spectra of indophenol assays with  $\text{NH}_4\text{Cl}$  after incubated for 2 h at ambient conditions. (b) Calibration curve used for calculation of  $\text{NH}_3$  concentrations.



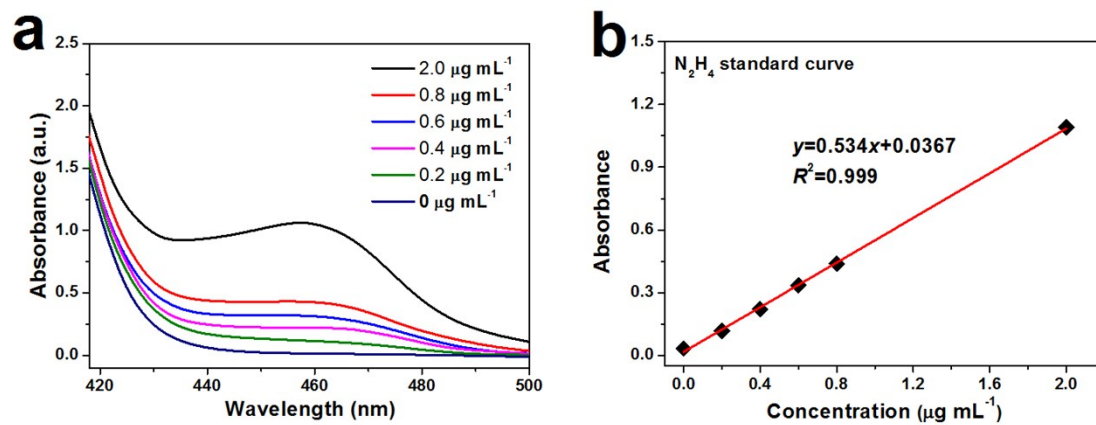

Fig. S4. (a) UV-Vis absorption spectra of  $N_2H_4$  assays after incubated for 20 min at ambient conditions. (b) Calibration curve used for calculation of  $N_2H_4$  concentrations.

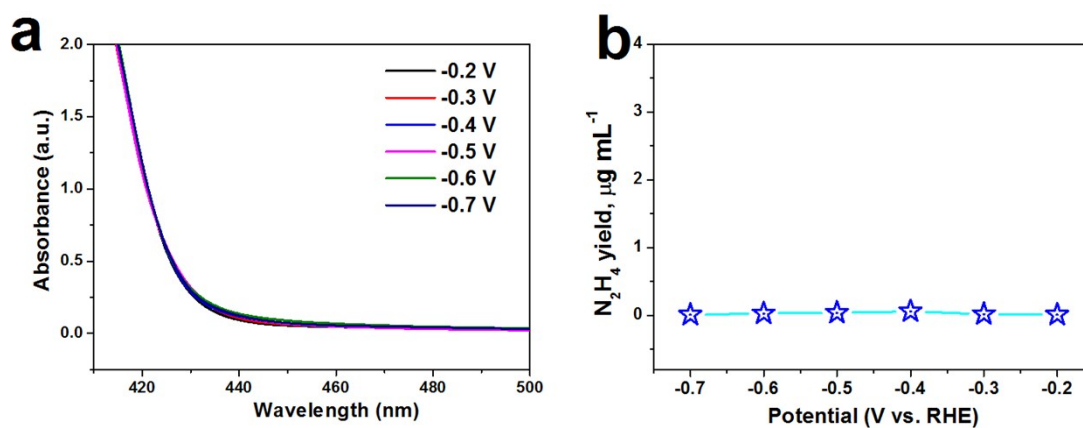

Fig. S5. (a) UV-Vis spectra of the electrolytes (stained with the chemical indicator based on the method of Watt and Chrisp) after 2 h electrocatalysis on B-MnO<sub>2</sub>/CC at various potentials, and (b) corresponding N<sub>2</sub>H<sub>4</sub> concentrations in the electrolytes.

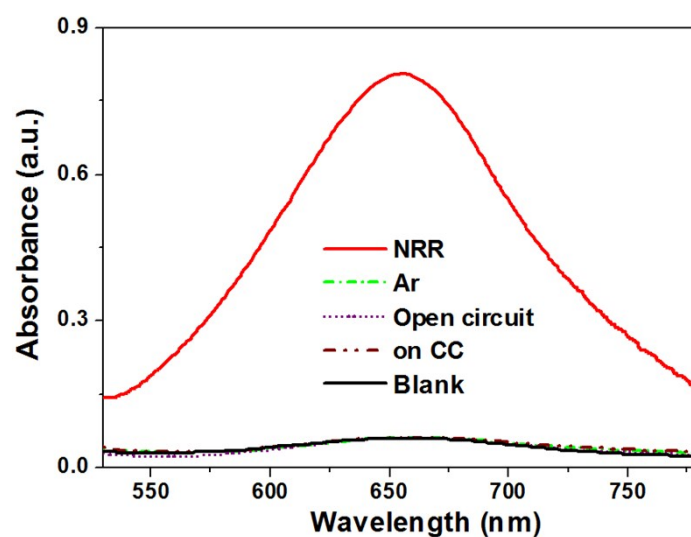

Fig. S6. UV-Vis absorption spectra of working electrolytes after 2 h of electrolysis on B-MnO<sub>2</sub>/CC at -0.4 V in N<sub>2</sub>-saturated solution, Ar-saturated solutions, N<sub>2</sub>-saturated solution at open circuit, N<sub>2</sub>-saturated solution on pristine CC and blank data.

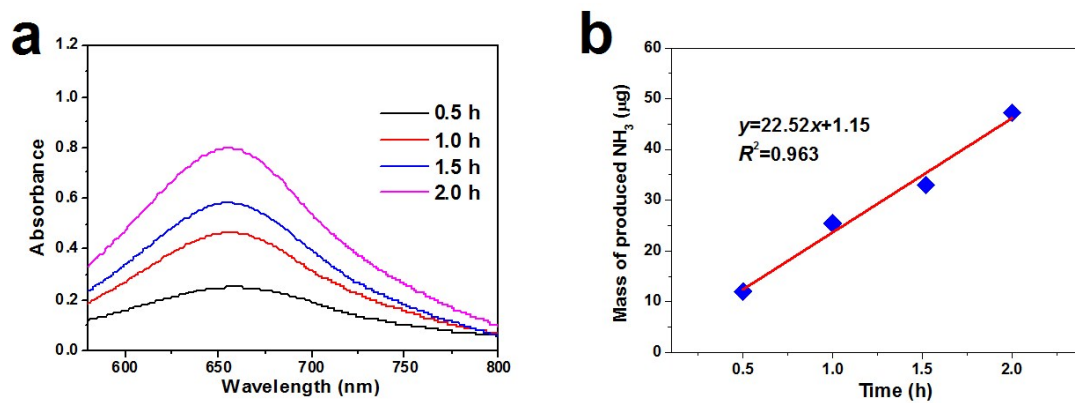

Fig. S7. (a) UV-Vis absorption spectra of the electrolytes after electrolysis at various times on B-MnO<sub>2</sub>/CC at -0.4 V, and (b) corresponding mass of produced NH<sub>3</sub>.

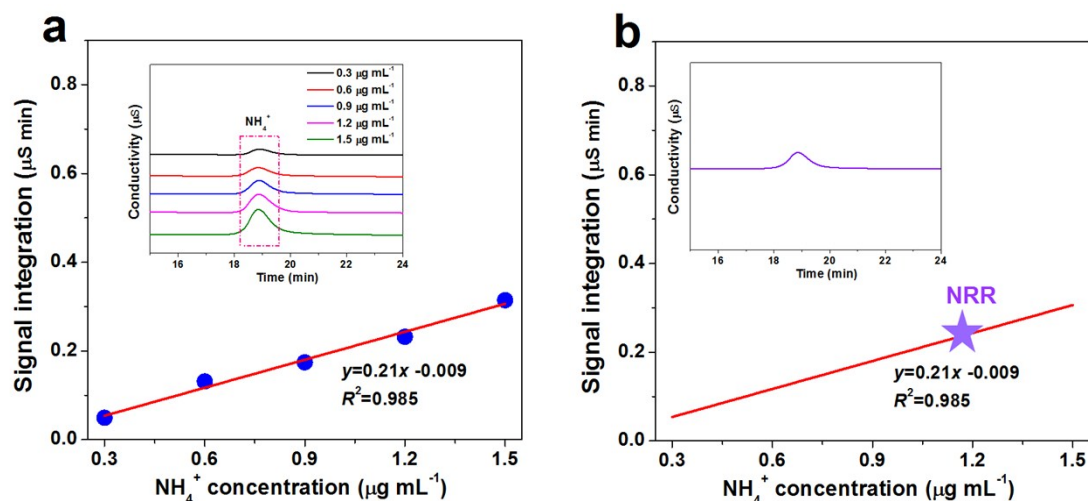

Fig. S8. (a) Ion chromatogram (IC) analysis of the  $\text{NH}_4^+$  ions at different concentrations (inset), and corresponding calibration curve of  $\text{NH}_4^+$  concentration vs. peak area. (b) IC spectra of the electrolyte after NRR electrolysis on B-MnO<sub>2</sub>/CC for 2 h at -0.4 V (inset), and the determined  $\text{NH}_4^+$  concentration of the electrolyte by referring to the calibration curve. The IC determined value is 1.15  $\mu\text{g mL}^{-1}$ , consistent well with 1.23  $\mu\text{g mL}^{-1}$  determined by the UV-vis analysis based on the indophenol blue method within the reasonable margin of experimental error.

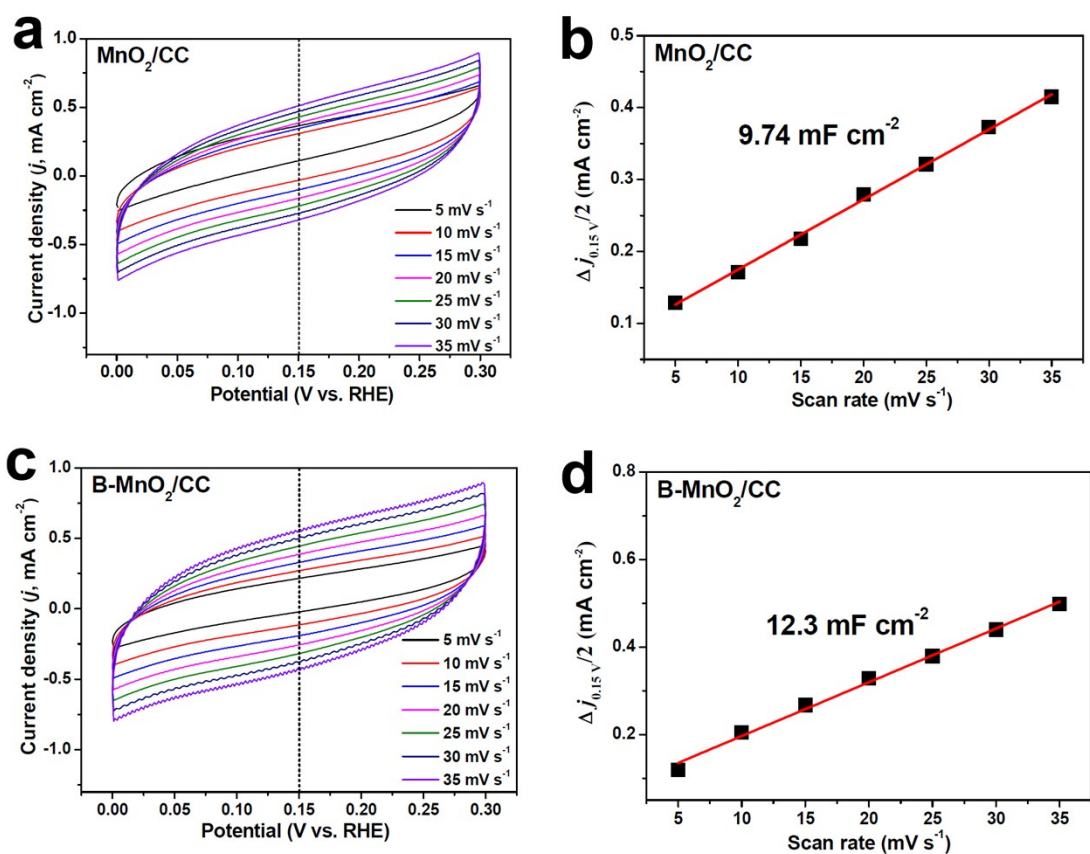

Fig. S9. Electrochemical double-layer capacitance ( $C_{\text{dl}}$ ) measurements at different scanning rates of 5~35  $\text{mV s}^{-1}$  for (a, b)  $\text{MnO}_2/\text{CC}$  and (c, d)  $\text{B-MnO}_2/\text{CC}$ .

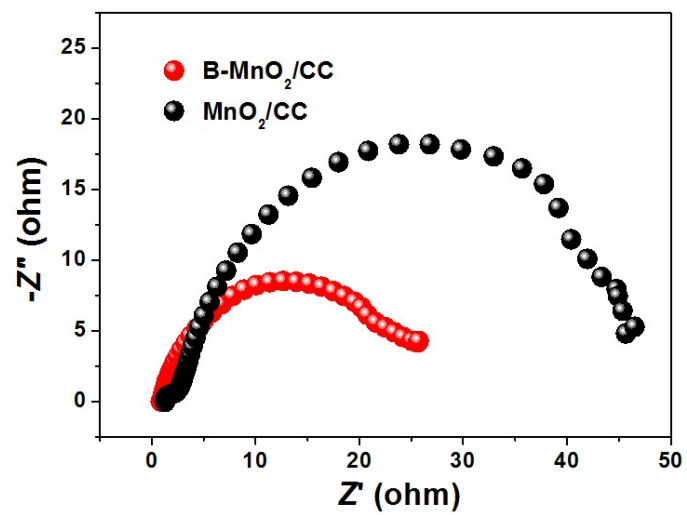

Fig. S10. Electrochemical impedance spectra of MnO<sub>2</sub>/CC and B-MnO<sub>2</sub>/CC.

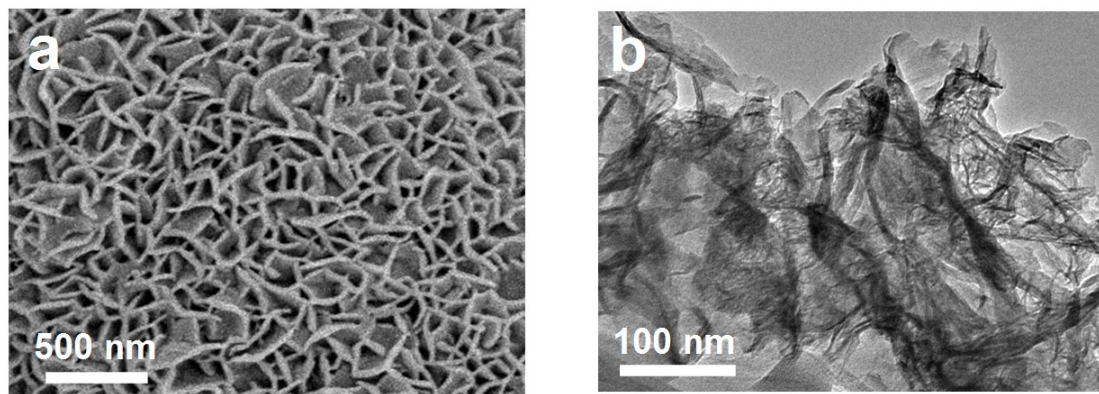

Fig. S11. Morphology of B-MnO<sub>2</sub>/CC after stability test. (a) SEM. (b) TEM.



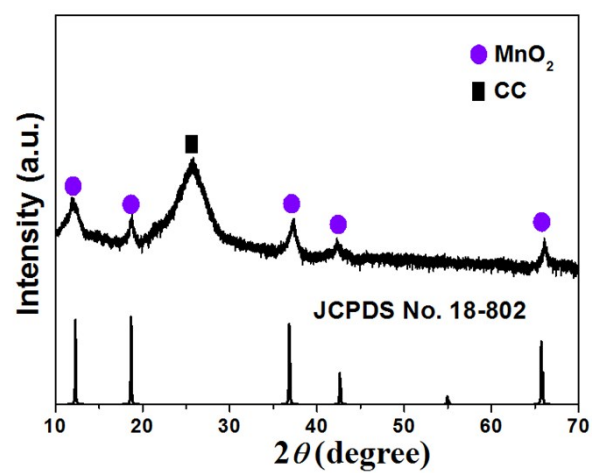

Fig. S12. XRD pattern of B-MnO<sub>2</sub>/CC after stability test.

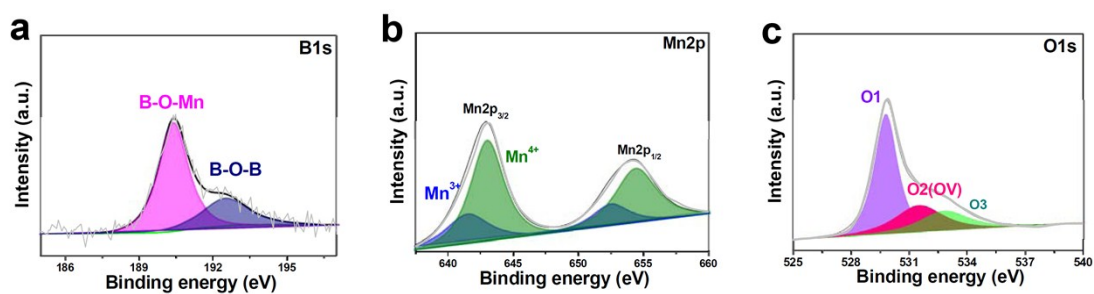

Fig. S13. XPS spectra of B-MnO<sub>2</sub> nanosheets scraped down from CC after stability test: (a) B1s; (b) Mn2p; (c) O1s.

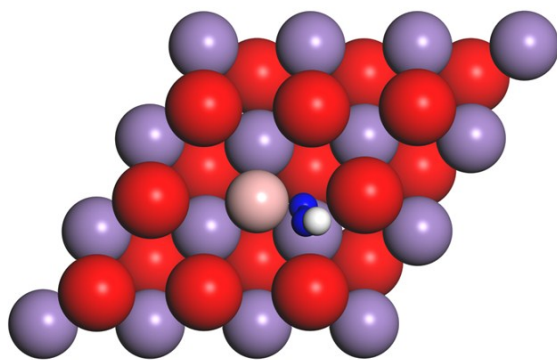

$$\Delta G_{*N_2H} = 1.27 \text{ eV}$$

$$\Delta G_{*N_2-*N_2H} = 1.12 \text{ eV}$$

Fig. S14. Optimized structures of  $N_2H$  adsorption on  $B_2O_3-MnO_2$ , and corresponding Gibbs free energies for  $*N_2H$  formation ( $G_{*N_2H}$ ) and energy barriers for the conversion of  $*N_2$  to  $*N_2H$  ( $\Delta G_{*N_2-*N_2H}$ ).

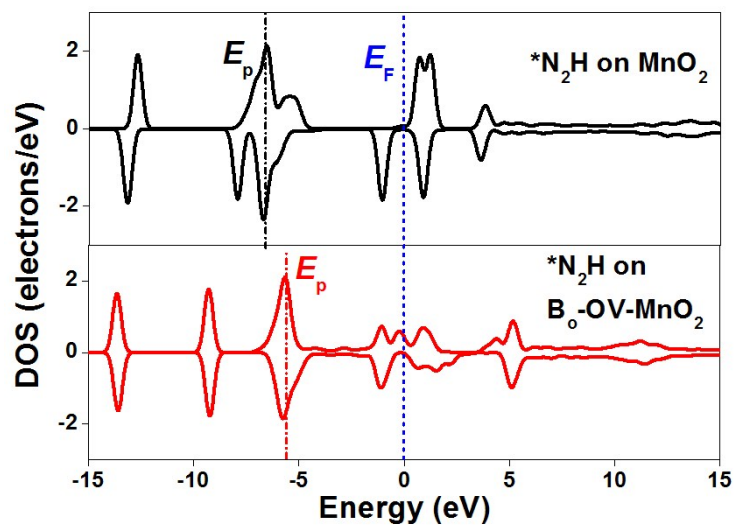

Fig. S15. PDOS of the  $*N_2H$  intermediate on  $MnO_2$  and  $B_0$ -OV- $MnO_2$ .

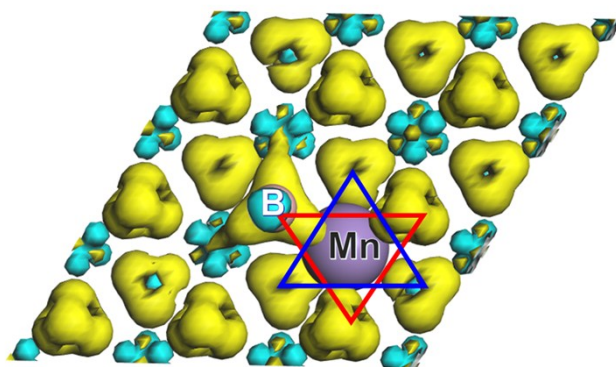

Fig. S16. Charge density distribution on  $\text{B}_0\text{-MnO}_2$ . Yellow and cyan regions correspond to the electron accumulation and depletion, respectively.

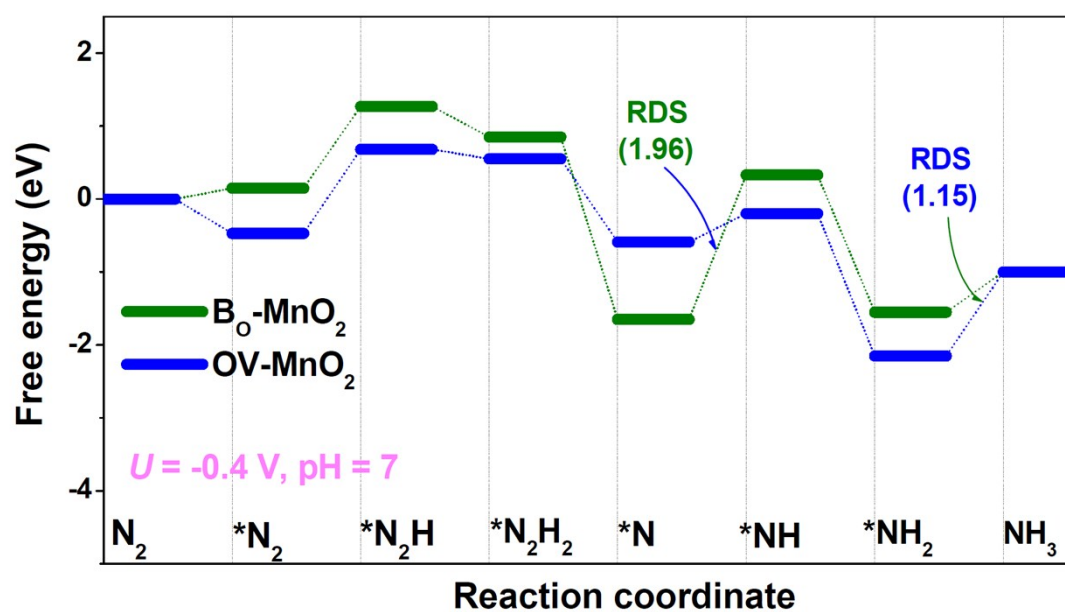

Fig. S17. Free energy diagrams of distal NRR pathway on  $\text{B}_\text{O}\text{-MnO}_2$  and  $\text{OV-MnO}_2$  at  $U = -0.4 \text{ V}$  and  $\text{pH} = 7$ .

Table S1. Comparison of optimum NH<sub>3</sub> yield and Faradic efficiency (FE) for recently reported state-of-the-art NRR electrocatalysts at ambient conditions

| Catalyst                                      | Electrolyte                           | Determination method         | Optimum Potential (V vs RHE) | NH <sub>3</sub> yield rate (μg h <sup>-1</sup> mg <sup>-1</sup> ) | FE (%)      | Ref. |
|-----------------------------------------------|---------------------------------------|------------------------------|------------------------------|-------------------------------------------------------------------|-------------|------|
| Mo single atoms                               | 0.1 M KOH                             | Indophenol blue method (NMR) | -0.3                         | 34                                                                | 14.6        | [4]  |
| Mosaic Bi nanosheets                          | 0.1 M Na <sub>2</sub> SO <sub>4</sub> | Indophenol blue method       | -0.8                         | 13.23                                                             | 10.46       | [5]  |
| Sulfur dots-graphene nanohybrid               | 0.5 M LiClO <sub>4</sub>              | Indophenol blue method       | -0.85                        | 28.56                                                             | 7.07        | [6]  |
| Fe–N/C hybrid                                 | 0.1 M KOH                             | Indophenol blue method       | -0.2                         | 34.83                                                             | 9.28        | [7]  |
| MoO <sub>2</sub> with oxygen vacancies        | 0.1 M HCl                             | Indophenol blue method       | -0.15                        | 12.2                                                              | 8.2         | [8]  |
| CoP hollow nanocage                           | 1.0 M KOH                             | Indophenol blue method       | -0.4                         | 10.78                                                             | 7.36        | [9]  |
| Black phosphorus                              | 0.01 M HCl                            | Indophenol blue method       | -0.7                         | 31.37                                                             | 5.07 (-0.6) | [10] |
| Rh nanosheets                                 | 0.1 m KOH                             | Phenolhypochlorite method    | -0.2                         | 23.88                                                             | 0.217       | [11] |
| Au/CeO <sub>x</sub> -RGO                      | 0.1 M KOH                             | Salicylate method            | -0.2                         | 8.31                                                              | 10.1        | [12] |
| Au-TiO <sub>2</sub> sub-nanocluster           | 0.1 M HCl                             | Indophenol blue method       | -0.2                         | 21.4                                                              | 8.11        | [13] |
| Pd/C                                          | 0.1 M PBS                             | Indophenol blue method       | 0.1                          | 4.5                                                               | 8.2         | [14] |
| Mo <sub>2</sub> C/C                           | 0.5 M Li <sub>2</sub> SO <sub>4</sub> | Nessler's reagent method     | -0.3                         | 11.3                                                              | 7.8         | [15] |
| Ti <sub>3</sub> C <sub>2</sub> T <sub>x</sub> | 0.1 M HCl                             | Indophenol blue method       | -0.4                         | 20.4                                                              | 9.3         | [16] |
| MoS <sub>2</sub> with Li-S Interactions       | 0.1 M Li <sub>2</sub> SO <sub>4</sub> | Indophenol blue method       | -0.2                         | 43.4                                                              | 9.81        | [17] |
| Fe <sub>2</sub> O <sub>3</sub> nanorod        | 0.1 M Na <sub>2</sub> SO <sub>4</sub> | Indophenol blue method       | -0.8                         | 15.9                                                              | 0.94        | [18] |
| Defect-rich MoS <sub>2</sub> nanoflower       | 0.1 M Na <sub>2</sub> SO <sub>4</sub> | Indophenol blue method       | -0.4                         | 29.28                                                             | 8.34        | [19] |
| Nb <sub>2</sub> O <sub>5</sub> nanofibers     | 0.1 M HCl                             | Indophenol blue method       | -0.55                        | 43.6                                                              | 9.26        | [20] |
| S-doped carbon                                | 0.1 M                                 | Indophenol blue              | -0.7                         | 19.07                                                             | 7.47        | [21] |

|                                                                                  |                                       |                        |       |       |              |           |
|----------------------------------------------------------------------------------|---------------------------------------|------------------------|-------|-------|--------------|-----------|
| nanospheres                                                                      | Na <sub>2</sub> SO <sub>4</sub>       | method                 |       |       |              |           |
| C-doped TiO <sub>2</sub> nanoparticles                                           | 0.1 M Na <sub>2</sub> SO <sub>4</sub> | Indophenol blue method | -0.7  | 16.22 | 1.84         | [22]      |
| F-doped $\beta$ -FeOOH nanorod                                                   | 0.5 M LiClO <sub>4</sub>              | Indophenol blue method | -0.6  | 42.38 | 9.02         | [23]      |
| Defect-rich fluorographene nanosheet                                             | 0.1 M Na <sub>2</sub> SO <sub>4</sub> | Indophenol blue method | -0.7  | 9.3   | 4.2          | [24]      |
| MoO <sub>3</sub> nanosheets                                                      | 0.1 M HCl                             | Indophenol blue method | -0.5  | 29.43 | 1.9          | [25]      |
| MoO <sub>2</sub> /graphene                                                       | 0.1 M Na <sub>2</sub> SO <sub>4</sub> | Indophenol blue method | -0.35 | 37.4  | 6.6          | [26]      |
| Cr <sub>2</sub> O <sub>3</sub> /RGO                                              | 0.1 M HCl                             | Indophenol blue method | -0.6  | 33.3  | 7.33         | [27]      |
| MnO particles                                                                    | 0.1 M Na <sub>2</sub> SO <sub>4</sub> | Indophenol blue method | -0.39 | 7.92  | 8.02         | [28]      |
| Mn <sub>3</sub> O <sub>4</sub> nanocubes                                         | 0.1 M Na <sub>2</sub> SO <sub>4</sub> | Indophenol blue method | -0.8  | 11.6  | 3            | [29]      |
| Mn <sub>3</sub> O <sub>4</sub> /RGO                                              | 0.1 M Na <sub>2</sub> SO <sub>4</sub> | Indophenol blue method | -0.85 | 17.4  | 3.52         | [30]      |
| MnO <sub>2</sub> -Ti <sub>3</sub> C <sub>2</sub> T <sub>x</sub> MXene nanohybrid | 0.1 M HCl                             | Indophenol blue method | -0.55 | 34.12 | 11.39        | [31]      |
| B-MnO <sub>2</sub> /CC                                                           | 0.5 M LiClO <sub>4</sub>              | Indophenol blue method | -0.4  | 54.2  | 16.8 (-0.2V) | This work |

### Supplementary references

- [1]. D. Zhu, L. Zhang, R. E. Ruther and R. J. Hamers, *Nat. Mater.*, 2013, **12**, 836.
- [2]. G. W. Watt and J. D. Chrisp, *Anal. Chem.*, 1952, **24**, 2006-2008.
- [3]. S. J. Clark, M. D. Segall, C. J. Pickard, P. J. Hasnip, M. I. J. Probert, K. Refson and M. C. Payne, *Z. Kristallogr.*, 2005, **220**, 567-570.
- [4]. L. Han, X. Liu, J. Chen, R. Lin, H. Liu, F. Lu, S. Bak, Z. Liang, S. Zhao and E. Stavitski, *Angew. Chem. Int. Edit.*, 2018, **58**, 2321-2325.
- [5]. L. Li, C. Tang, B. Xia, H. Jin, Y. Zheng and S.-Z. Qiao, *ACS Catal.*, 2019, **9**, 2902-2908.
- [6]. H. Chen, X. Zhu, H. Huang, H. Wang, T. Wang, R. Zhao, H. Zheng, A. M. Asiri, Y. Luo and X. Sun, *Chem. Commun.*, 2019, **55**, 3152-3155.
- [7]. Y. Wang, X. Cui, J. Zhao, G. Jia, L. Gu, Q. Zhang, L. Meng, Z. Shi, L. Zheng and C. Wang, *ACS Catal.*, 2018, **9**, 336-344.
- [8]. G. Zhang, Q. Ji, K. Zhang, Y. Chen, Z. Li, H. Liu, J. Li and J. Qu, *Nano Energy*, 2019, **59**, 10-16.
- [9]. W. Guo, Z. Liang, J. Zhao, B. Zhu, K. Cai, R. Zou and Q. Xu, *Small Methods*, 2018, **2**, 1800204.
- [10]. L. L. Zhang, L. X. Ding, G. F. Chen, X. F. Yang and H. H. Wang, *Angew. Chem. Int. Edit.*, 2019, **131**, 2638-2642.
- [11]. H. M. Liu, S. H. Han, Y. Zhao, Y. Y. Zhu, X. L. Tian, J. H. Zeng, J. X. Jiang, B. Y. Xia and Y.



- Chen, *J. Mater. Chem. A*, 2018, **6**, 3211-3217.
- [12]. S. J. Li, D. Bao, M. M. Shi, B. R. Wulan, J. M. Yan and Q. Jiang, *Adv. Mater.*, 2017, **29**, 1700001.
- [13]. M. M. Shi, D. Bao, B. R. Wulan, Y. H. Li, Y. F. Zhang, J. M. Yan and Q. Jiang, *Adv. Mater.*, 2017, **29**, 1606550.
- [14]. J. Wang, L. Yu, L. Hu, G. Chen, H. Xin and X. Feng, *Nat. Commun.*, 2018, **9**, 1795.
- [15]. H. Cheng, L. X. Ding, G. F. Chen, L. Zhang, J. Xue and H. Wang, *Adv. Mater.*, 2018, **30**, 1803694.
- [16]. J. Zhao, L. Zhang, X.-Y. Xie, X. Li, Y. Ma, Q. Liu, W.-h. Fang, X. Shi, G. Cui and X. Sun, *J. Mater. Chem. A*, 2018, **6**, 24031-24035.
- [17]. Y. Liu, M. Han, Q. Xiong, S. Zhang, C. Zhao, W. Gong, G. Wang, H. Zhang and H. Zhao, *Adv. Energy. Mater.*, 2019, **9**, 1803935.
- [18]. X. Xiang, Z. Wang, X. Shi, M. Fan and X. Sun, *Chemcatchem*, 2018, **10**, 4530-4535.
- [19]. X. Li, T. Li, Y. Ma, Q. Wei, W. Qiu, H. Guo, X. Shi, P. Zhang, A. M. Asiri and L. Chen, *Adv. Energy. Mater.*, 2018, **8**, 1801357.
- [20]. J. Han, Z. Liu, Y. Ma, G. Cui, F. Xie, F. Wang, Y. Wu, S. Gao, Y. Xu and X. Sun, *Nano Energy*, 2018, **52**, 264-270.
- [21]. L. Xia, X. Wu, Y. Wang, Z. Niu, Q. Liu, T. Li, X. Shi, A. M. Asiri and X. Sun, *Small Methods*, 2018, **3**, 1800251.
- [22]. Y. Wang, Q. Pan, B. Zhong, Y. Luo, G. Cui, X.-D. Guo and X. Sun, *Nanoscale Adv.*, 2019, **1**, 961-964.
- [23]. X. Zhu, Z. Liu, H. Wang, R. Zhao, H. Chen, T. Wang, F. Wang, Y. Luo, Y. Wu and X. Sun, *Chem. Commun.*, 2019, **55**, 3987-3990.
- [24]. J. Zhao, J. Yang, L. Ji, H. Wang, H. Chen, Z. Niu, Q. Liu, T. Li, G. Cui and X. Sun, *Chem. Commun.*, 2019, **55**, 4266-4269.
- [25]. J. Han, X. Ji, X. Ren, G. Cui, L. Li, F. Xie, H. Wang, B. Li and X. Sun, *J. Mater. Chem. A*, 2018, **6**, 12974-12977.
- [26]. J. Wang, Y. P. Liu, H. Zhang, D. J. Huang and K. Chu, *Catal. Sci. Technol.*, 2019, **9**, 4248-4254.
- [27]. L. Xia, B. Li, Y. Zhang, R. Zhang, L. Ji, H. Chen, G. Cui, H. Zheng, X. Sun, F. Xie and Q. Liu, *Inorg. Chem.*, 2019, **58**, 2257-2260.
- [28]. Z. Wang, F. Gong, L. Zhang, R. Wang, L. Ji, Q. Liu, Y. Luo, H. Guo, Y. Li, P. Gao, X. Shi, B. Li, B. Tang and X. Sun, *Adv. Sci.*, 2018, 1801182.
- [29]. X. Wu, L. Xia, Y. Wang, W. Lu, Q. Liu, X. Shi and X. Sun, *Small*, 2018, **14**, 1803111.
- [30]. H. Huang, F. Gong, Y. Wang, H. Wang, X. Wu, W. Lu, R. Zhao, H. Chen, X. Shi, A. M. Asiri, T. Li, Q. Liu and X. Sun, *Nano Res.*, 2019, **12**, 1093-1098.
- [31]. W. Kong, F. Gong, Q. Zhou, G. Yu, L. Ji, X. Sun, A. M. Asiri, T. Wang, Y. Luo and Y. Xu, *J. Mater. Chem. A*, 2019, **7**, 18823-18827.
